# Supplementary material for: Global Gender Disparities in Premature Death from Cardiovascular Disease, and Their Associations with Country Capacity for Noncommunicable Disease Prevention and Control
Source: MDPI journal article supplement (doi:10.3390/ijerph181910389), 2021-10-02
Supplement: s1 [file s1]

Table S1. Premature CVD-related death rates and relative gender differences by CVD subtype, from 2000 to 2016

|             |                    | 2000  |       |       |                          | 2010  |       |       |                          | 2015  |       |       |                          | 2016  |       |       |                          | APC  | p for trend |
|-------------|--------------------|-------|-------|-------|--------------------------|-------|-------|-------|--------------------------|-------|-------|-------|--------------------------|-------|-------|-------|--------------------------|------|-------------|
|             |                    | mean  | 95%CI |       | percentage of CVD deaths | mean  | 95%CI |       | percentage of CVD deaths | mean  | 95%CI |       | percentage of CVD deaths | mean  | 95%CI |       | percentage of CVD deaths |      |             |
| Relative    | Total CVD          | 35.6  | 32.2  | 38.9  | NA                       | 39.0  | 35.6  | 42.4  | NA                       | 39.8  | 36.4  | 43.2  | NA                       | 40.5  | 37.1  | 43.9  | NA                       | 0.8  | 0.177       |
| Gender      | RHD                | -42.8 | -51.4 | -34.3 | NA                       | -37.1 | -45.7 | -28.6 | NA                       | -33.1 | -40.9 | -25.3 | NA                       | -31.5 | -39.4 | -23.7 | NA                       | -1.8 | 0.220       |
| Differences | HHD                | -32.6 | -46.5 | -18.7 | NA                       | -21.6 | -34.9 | -8.3  | NA                       | -21.5 | -35.0 | -8.0  | NA                       | -18.0 | -31.2 | -4.8  | NA                       | -3.2 | 0.464       |
| (%)         | IHD                | 47.9  | 45.2  | 50.7  | NA                       | 49.9  | 46.9  | 52.9  | NA                       | 50.4  | 47.4  | 53.4  | NA                       | 51.1  | 48.1  | 54.0  | NA                       | 0.4  | 0.487       |
|             | Stroke             | 17.1  | 13.0  | 21.3  | NA                       | 22.6  | 18.5  | 26.8  | NA                       | 24.3  | 20.1  | 28.5  | NA                       | 24.8  | 20.5  | 29.0  | NA                       | 2.3  | 0.045       |
|             | Ischemic stroke    | 20.4  | 15.2  | 25.6  | NA                       | 26.5  | 21.6  | 31.3  | NA                       | 27.4  | 22.5  | 32.3  | NA                       | 27.9  | 23.0  | 32.9  | NA                       | 2.0  | 0.128       |
|             | Hemorrhagic stroke | 14.9  | 10.8  | 18.9  | NA                       | 20.3  | 16.2  | 24.4  | NA                       | 22.4  | 18.3  | 26.5  | NA                       | 22.9  | 18.7  | 27.1  | NA                       | 2.8  | 0.025       |
|             | Cardiomyopathy     | 38.4  | 32.3  | 44.4  | NA                       | 43.3  | 38.9  | 47.6  | NA                       | 44.0  | 39.9  | 48.1  | NA                       | 44.0  | 39.5  | 48.4  | NA                       | 0.9  | 0.291       |
|             | Other CVDs         | 27.4  | 22.7  | 32.1  | NA                       | 29.0  | 24.5  | 33.5  | NA                       | 27.0  | 22.1  | 31.8  | NA                       | 27.2  | 22.5  | 31.9  | NA                       | -0.1 | 0.929       |
| Men (per    | Total CVD          | 139.4 | 130.3 | 148.6 | NA                       | 116.1 | 107.4 | 124.7 | NA                       | 106.1 | 98.4  | 113.9 | NA                       | 104.7 | 97.1  | 112.3 | NA                       | -1.8 | <.0001      |
| 100,000     | RHD                | 2.2   | 1.9   | 2.4   | 1.5                      | 1.5   | 1.3   | 1.6   | 1.2                      | 1.3   | 1.1   | 1.4   | 1.2                      | 1.2   | 1.0   | 1.4   | 1.2                      | -3.6 | <.0001      |
| people)     | HHD                | 5.1   | 4.4   | 5.9   | 3.7                      | 4.6   | 3.9   | 5.2   | 3.9                      | 4.4   | 3.7   | 5.0   | 4.1                      | 4.3   | 3.7   | 5.0   | 4.1                      | -1.1 | 0.297       |
|             | IHD                | 80.3  | 74.0  | 86.6  | 57.6                     | 66.9  | 61.1  | 72.7  | 57.6                     | 60.9  | 55.7  | 66.0  | 57.4                     | 60.1  | 55.0  | 65.1  | 57.4                     | -1.8 | <.0001      |
|             | Stroke             | 38.7  | 35.6  | 41.7  | 27.7                     | 31.6  | 28.8  | 34.5  | 27.3                     | 28.7  | 26.0  | 31.4  | 27.0                     | 28.3  | 25.6  | 30.9  | 27.0                     | -2.0 | <.0001      |
|             | Ischemic stroke    | 12.8  | 11.5  | 14.1  | 9.2                      | 10.4  | 9.3   | 11.5  | 8.9                      | 9.2   | 8.3   | 10.2  | 8.7                      | 9.1   | 8.2   | 10.0  | 8.7                      | -2.1 | <.0001      |
|             | Hemorrhagic stroke | 25.9  | 23.7  | 28.0  | 18.5                     | 21.3  | 19.1  | 23.4  | 18.3                     | 19.4  | 17.4  | 21.5  | 18.3                     | 19.2  | 17.2  | 21.2  | 18.3                     | -1.9 | <.0001      |
|             | Cardiomyopathy     | 4.5   | 3.8   | 5.3   | 3.3                      | 4.3   | 3.5   | 5.1   | 3.7                      | 4.2   | 3.5   | 4.8   | 3.9                      | 4.1   | 3.5   | 4.8   | 3.9                      | -0.6 | 0.848       |
|             | Other CVDs         | 8.8   | 8.0   | 9.5   | 6.3                      | 7.3   | 6.7   | 7.9   | 6.3                      | 6.9   | 6.3   | 7.5   | 6.5                      | 6.8   | 6.2   | 7.4   | 6.5                      | -1.6 | <.0001      |
| Women (per  | Total CVD          | 88.9  | 82.6  | 95.3  | NA                       | 70.9  | 65.1  | 76.7  | NA                       | 64.4  | 58.9  | 70.0  | NA                       | 63.0  | 57.5  | 68.5  | NA                       | -2.1 | <.0001      |
| 100,000     | RHD                | 2.7   | 2.4   | 3.1   | 3.1                      | 1.8   | 1.6   | 2.1   | 2.6                      | 1.5   | 1.3   | 1.8   | 2.4                      | 1.5   | 1.3   | 1.7   | 2.4                      | -3.7 | <.0001      |
| people)     | HHD                | 5.8   | 5.1   | 6.5   | 6.6                      | 4.9   | 4.3   | 5.5   | 6.9                      | 4.5   | 4.0   | 5.1   | 7.0                      | 4.4   | 3.9   | 5.0   | 7.0                      | -1.7 | 0.006       |

|                                  |                    |       |       |       |      |      |      |      |      |      |      |      |      |      |      |      |      |      |        |
|----------------------------------|--------------------|-------|-------|-------|------|------|------|------|------|------|------|------|------|------|------|------|------|------|--------|
| Total (per<br>100,000<br>people) | IHD                | 40.9  | 37.5  | 44.3  | 46.0 | 33.1 | 30.0 | 36.1 | 46.6 | 30.1 | 27.2 | 32.9 | 46.6 | 29.3 | 26.5 | 32.1 | 46.6 | -2.1 | <.0001 |
|                                  | Stroke             | 31.3  | 28.7  | 33.9  | 35.2 | 24.2 | 21.9 | 26.5 | 34.1 | 21.6 | 19.3 | 23.8 | 33.4 | 21.0 | 18.8 | 23.2 | 33.4 | -2.5 | <.0001 |
|                                  | Ischemic stroke    | 9.8   | 8.9   | 10.7  | 11.0 | 7.5  | 6.7  | 8.3  | 10.6 | 6.7  | 5.9  | 7.4  | 10.4 | 6.5  | 5.8  | 7.2  | 10.3 | -2.5 | <.0001 |
|                                  | Hemorrhagic stroke | 21.5  | 19.6  | 23.5  | 24.2 | 16.7 | 15.0 | 18.4 | 23.5 | 14.9 | 13.3 | 16.5 | 23.1 | 14.5 | 12.9 | 16.1 | 23.1 | -2.4 | <.0001 |
|                                  | Cardiomyopathy     | 2.3   | 2.0   | 2.6   | 2.6  | 2.0  | 1.7  | 2.2  | 2.8  | 1.9  | 1.7  | 2.1  | 3.0  | 1.9  | 1.7  | 2.1  | 3.0  | -1.2 | 0.099  |
|                                  | Other CVDs         | 6.1   | 5.5   | 6.7   | 6.8  | 5.1  | 4.5  | 5.6  | 7.1  | 5.0  | 4.4  | 5.5  | 7.7  | 4.9  | 4.4  | 5.4  | 7.8  | -1.3 | 0.009  |
|                                  | Total CVD          | 113.2 | 106.1 | 120.3 | NA   | 92.6 | 86.0 | 99.1 | NA   | 84.5 | 78.4 | 90.6 | NA   | 82.9 | 76.9 | 88.9 | NA   | -1.9 | <.0001 |
|                                  | RHD                | 2.4   | 2.1   | 2.7   | 2.1  | 1.6  | 1.4  | 1.8  | 1.7  | 1.4  | 1.2  | 1.6  | 1.6  | 1.3  | 1.1  | 1.5  | 1.6  | -3.6 | <.0001 |
|                                  | HHD                | 5.5   | 4.8   | 6.1   | 4.8  | 4.7  | 4.1  | 5.3  | 5.1  | 4.4  | 3.9  | 5.0  | 5.3  | 4.4  | 3.8  | 4.9  | 5.3  | -1.4 | 0.042  |
|                                  | IHD                | 59.9  | 55.4  | 64.4  | 52.9 | 49.4 | 45.3 | 53.4 | 53.3 | 45.0 | 41.2 | 48.6 | 53.2 | 44.1 | 40.5 | 47.7 | 53.2 | -1.9 | <.0001 |
|                                  | Stroke             | 34.8  | 32.1  | 37.4  | 30.7 | 27.7 | 25.3 | 30.2 | 29.9 | 24.9 | 22.6 | 27.2 | 29.5 | 24.4 | 22.1 | 26.7 | 29.5 | -2.2 | <.0001 |
|                                  | Ischemic stroke    | 11.2  | 10.2  | 12.2  | 9.9  | 8.9  | 8.0  | 9.7  | 9.6  | 7.9  | 7.1  | 8.6  | 9.3  | 7.7  | 6.9  | 8.4  | 9.3  | -2.3 | <.0001 |
|                                  | Hemorrhagic stroke | 23.6  | 21.7  | 25.6  | 20.8 | 18.9 | 17.0 | 20.7 | 20.4 | 17.0 | 15.3 | 18.8 | 20.1 | 16.7 | 15.0 | 18.4 | 20.2 | -2.1 | <.0001 |
|                                  | Cardiomyopathy     | 3.4   | 2.8   | 3.9   | 3.0  | 3.1  | 2.6  | 3.6  | 3.3  | 3.0  | 2.6  | 3.4  | 3.5  | 2.9  | 2.5  | 3.3  | 3.5  | -0.8 | 0.577  |
|                                  | Other CVDs         | 7.3   | 6.7   | 8.0   | 6.5  | 6.1  | 5.6  | 6.7  | 6.6  | 5.9  | 5.4  | 6.4  | 7.0  | 5.8  | 5.3  | 6.3  | 7.0  | -1.5 | 0.000  |

Abbreviations: RHD, rheumatic heart disease; HHD, hypertensive heart disease; IHD, ischemic heart disease; APC, annual percentage of change; NA, not applicable.

Table S2. Distribution of national NCD capacity indicators by income group, 2015

| Income Group                                                                                                                                | HICs<br>N=51 |      | UMICs<br>N=47 |      | LMICs<br>N=43 |      | LICs<br>N=26 |      | Total<br>N=167 |      |
|---------------------------------------------------------------------------------------------------------------------------------------------|--------------|------|---------------|------|---------------|------|--------------|------|----------------|------|
|                                                                                                                                             | N            | %    | N             | %    | N             | %    | N            | %    | N              | %    |
| Existence of an Operational Unit, Branch, or Dept. in Ministry of Health with responsibility for NCDs                                       | 43           | 84.3 | 37            | 78.7 | 22            | 51.2 | 11           | 42.3 | 113            | 67.7 |
| Existence of a national multisectoral commission, agency or mechanism for NCDs                                                              | 25           | 49   | 18            | 38.3 | 9             | 20.9 | 5            | 19.2 | 57             | 34.1 |
| Existence of an operational, multisectoral national NCD policy, strategy or action plan that integrates several NCDs and their risk factors | 26           | 51   | 21            | 44.7 | 14            | 32.6 | 10           | 38.5 | 71             | 42.5 |
| Existence of operational policy/strategy/action plan for cardiovascular diseases                                                            | 39           | 76.5 | 35            | 74.5 | 25            | 58.1 | 17           | 65.4 | 116            | 69.5 |
| Availability of cardiovascular risk stratification in 50% or more primary health care facilities                                            | 22           | 43.1 | 11            | 23.4 | 2             | 4.7  | 2            | 7.7  | 37             | 22.2 |
| Has a STEPS survey or a comprehensive health examination survey every 5 years                                                               | 17           | 33.3 | 10            | 21.3 | 6             | 14   | 3            | 11.5 | 36             | 21.6 |

Abbreviations: HIC, high-income countries; UMICs, upper middle-income countries; LMIC, lower middle-income countries; LICs, low-income countries.

Table S3. Differences of CVD mortality among indicators of national NCD prevention capacity, 2015

| Indicators of National Capacity                                                                                                             |     | Men   |        |       | <i>p</i><br>value | Women |        |       | <i>p</i><br>value |
|---------------------------------------------------------------------------------------------------------------------------------------------|-----|-------|--------|-------|-------------------|-------|--------|-------|-------------------|
|                                                                                                                                             |     | mean  | 95% CI |       |                   | mean  | 95% CI |       |                   |
| Existence of an Operational Unit, Branch, or Dept. in Ministry of Health with responsibility for NCDs                                       | No  | 119.7 | 37.4   | 192.4 | 0.034             | 82.8  | 14.8   | 146.0 | <0.0001           |
|                                                                                                                                             | Yes | 100.5 | 31.2   | 227.5 |                   | 54.5  | 11.3   | 118.0 |                   |
| Existence of a national multisectoral commission, agency or mechanism for NCDs                                                              | No  | 107.6 | 35.3   | 209.4 | 0.767             | 69.3  | 11.3   | 144.3 | 0.008             |
|                                                                                                                                             | Yes | 105.0 | 31.2   | 230.5 |                   | 52.8  | 11.6   | 112.3 |                   |
| Existence of an operational, multisectoral national NCD policy, strategy or action plan that integrates several NCDs and their risk factors | No  | 109.7 | 34.0   | 225.7 | 0.027             | 65.7  | 11.3   | 136.6 | 0.031             |
|                                                                                                                                             | Yes | 76.9  | 31.2   | 190.7 |                   | 43.3  | 11.6   | 96.1  |                   |
| Existence of operational policy/strategy/action plan for cardiovascular diseases                                                            | No  | 113.5 | 30.3   | 192.4 | 0.291             | 74.7  | 10.6   | 146.0 | 0.013             |
|                                                                                                                                             | Yes | 103.7 | 34.0   | 227.5 |                   | 58.8  | 11.6   | 118.2 |                   |
| Availability of cardiovascular risk stratification in 50% or more primary health care facilities                                            | No  | 108.2 | 31.2   | 218.9 | 0.505             | 68.6  | 11.3   | 137.0 | 0.002             |
|                                                                                                                                             | Yes | 101.4 | 34.4   | 230.5 |                   | 46.4  | 13.4   | 106.2 |                   |
| Has a STEPS survey or a comprehensive health examination survey every 5 years                                                               | No  | 109.8 | 31.5   | 225.7 | 0.174             | 67.7  | 11.6   | 137.0 | 0.008             |
|                                                                                                                                             | Yes | 95.7  | 35.3   | 210.0 |                   | 48.8  | 11.3   | 121.5 |                   |

T-test was conducted between groups of national capacity.
